# Supplementary material for: Estrogen Modulates Epithelial Breast Cancer Cell Mechanics and Cell-to-Cell Contacts
Source: MDPI journal article supplement (doi:10.3390/ma14112897), 2021-05-28
Supplement: s1 [file s1]

Supplementary Materials

# Estrogen Modulates Epithelial Breast Cancer Cell Mechanics and Cell-to-Cell Contacts

Barbara Zbiral <sup>1,†</sup>, Andreas Weber <sup>1,\*,†</sup>, Jagoba Iturri <sup>1</sup>, Maria d. M. Vivanco <sup>2</sup> and José L. Toca-Herrera <sup>1,\*</sup>

<sup>1</sup> Institute for Biophysics, Department of Nanobiotechnology, University of Natural Resources and Life Sciences, Muthgasse 11, 1190 Vienna, Austria; barbara.zbiral@boku.ac.at (B.Z.); Jagoba.iturri@boku.ac.at (J.I.)

<sup>2</sup> CIC bioGUNE, Basque Research and Technology Alliance, BRTA, Bizkaia Technology Park, 48160 Derio, Spain; mdmvivanco@cicbiogune.es

\* Correspondence: andreas.weber@boku.ac.at (A.W.); jose.toca-herrera@boku.ac.at (J.L.T.-H.)

† These authors have contributed equally.

## 1. Short-term treatment with Estrogen

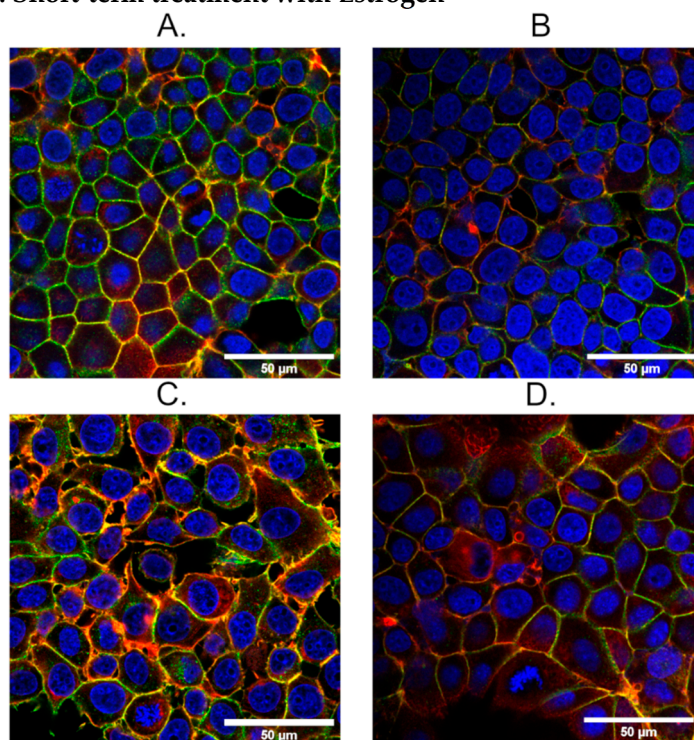

**Figure S1.** Short term (6 hour) treatment of MCF-7 cells with Estrogen (A–CTL DMEM, B–DMEM E<sub>2</sub>, C–CTL HF, D–HF E<sub>2</sub>). No significant changes due to estrogen treatment can be seen.

## 2. Performance of fitting stress relaxation data

**Citation:** Zbiral, B.; Weber, A.; Iturri, J.; Vivanco, M.d.M.; Toca-Herrera, J.L. Estrogen Modulates Epithelial Breast Cancer Cell Mechanics and Cell-to-Cell Contacts. *Materials* **2021**, *14*, 2897. <https://doi.org/10.3390/ma14112897>

Academic Editor: Claudio Canale and Ornella Cavalleri

Received: 7 May 2021

Accepted: 25 May 2021

Published: 28 May 2021

**Publisher's Note:** MDPI stays neutral with regard to jurisdictional claims in published maps and institutional affiliations.

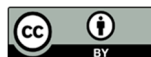

**Copyright:** © 2021 by the authors. Licensee MDPI, Basel, Switzerland. This article is an open access article distributed under the terms and conditions of the Creative Commons Attribution (CC BY) license (<http://creativecommons.org/licenses/by/4.0/>).

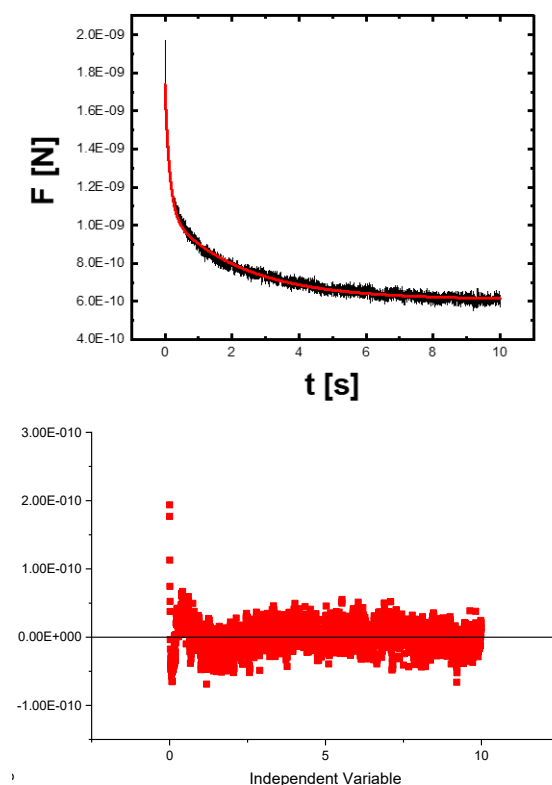

**Figure S2.** Fitting of the used viscoelastic model. (Left) Fitting of the stress relaxation curve using the model as described in Materials and Methods section. (Right) Residuals showing the very good agreement of the fitting with the data.

### 3. Statistical Properties and Analysis of Viscoelastic Properties

#### 3.1. Measurements performed with *tips*

##### 3.1.1. Elastic properties

**Table S1.** Apparent Young's Modulus values (in kPa) for MCF-7 cells measured with tips, shown are the number of measurements, the mean value, the standard deviation, the standard error of the mean value and the median.

|                     | N   | Mean | SD   | SE   | Median |
|---------------------|-----|------|------|------|--------|
| CTL DMEM            | 371 | 3.11 | 1.41 | 0.07 | 3.06   |
| DMEM E <sub>2</sub> | 387 | 2.59 | 1.13 | 0.06 | 2.41   |
| CTL HF              | 343 | 3.10 | 1.27 | 0.07 | 2.93   |
| HF E <sub>2</sub>   | 345 | 2.18 | 0.92 | 0.05 | 2.05   |

**Table S2.** Statistical analysis of apparent Young's Modulus values for MCF-7 cells (one-way ANOVA with post-hoc Tukey test). Differences with statistical significance are shown as bold.

|                     | CTL DMEM       | DMEM E <sub>2</sub> | CTL HF         | HF E <sub>2</sub> |
|---------------------|----------------|---------------------|----------------|-------------------|
| CTL DMEM            |                | <b>1.47E-8</b>      | 0.99           | <b>1E-20</b>      |
| DMEM E <sub>2</sub> | <b>1.47E-8</b> |                     | <b>5.92E-8</b> | <b>3.01E-5</b>    |
| CTL HF              | 0.99           | <b>5.92E-8</b>      |                | <b>1E-20</b>      |
| HF E <sub>2</sub>   | <b>1E-20</b>   | <b>3.01E-5</b>      | <b>1E-20</b>   |                   |

**Table S3.** Indentation values (in  $\mu\text{m}$ ) for MCF-7 cells measured with tips, shown are the number of measurements, the mean value, the standard deviation, the standard error of the mean value and the median.

|  | N | Mean | SD | SE | Median |
|--|---|------|----|----|--------|
|--|---|------|----|----|--------|

|                     |     |      |      |      |      |
|---------------------|-----|------|------|------|------|
| CTL DMEM            | 371 | 2.06 | 0.50 | 0.01 | 2.05 |
| DMEM E <sub>2</sub> | 387 | 2.38 | 0.64 | 0.01 | 2.35 |
| CTL HF              | 343 | 2.04 | 0.49 | 0.01 | 2.02 |
| HF E <sub>2</sub>   | 345 | 2.62 | 0.61 | 0.01 | 2.53 |

**Table S4.** Statistical analysis of apparent Young's Modulus values for MCF-7 cells (one-way ANOVA with post-hoc Tukey test). Differences with statistical significance are shown as bold.

|                     | CTL DMEM     | DMEM E <sub>2</sub> | CTL HF       | HF E <sub>2</sub> |
|---------------------|--------------|---------------------|--------------|-------------------|
| CTL DMEM            |              | <b>1E-20</b>        | 0.95         | <b>1E-20</b>      |
| DMEM E <sub>2</sub> | <b>1E-20</b> |                     | <b>1E-20</b> | <b>1.22E-7</b>    |
| CTL HF              | 0.95         | <b>1E-20</b>        |              | <b>1E-20</b>      |
| HF E <sub>2</sub>   | <b>1E-20</b> | <b>1.22E-7</b>      | <b>1E-20</b> |                   |

### 3.1.2. Viscoelastic properties

**Table S5.** Equilibrium Modulus values (in Pa) for MCF-7 cells measured with tips, shown are the number of measurements, the mean value, the standard deviation, the standard error of the mean value and the median.

|                     | N   | Mean | SD  | SE  | Median |
|---------------------|-----|------|-----|-----|--------|
| CTL DMEM            | 323 | 572  | 296 | 16  | 508    |
| DMEM E <sub>2</sub> | 352 | 392  | 200 | 11  | 348    |
| CTL HF              | 339 | 562  | 298 | 16  | 509    |
| HF E <sub>2</sub>   | 335 | 332  | 161 | 8.8 | 313    |

**Table S6.** Statistical analysis of equilibrium Modulus values for MCF-7 cells (one-way ANOVA with post-hoc Tukey test). Differences with statistical significance are shown as bold.

|                     | CTL DMEM     | DMEM E <sub>2</sub> | CTL HF       | HF E <sub>2</sub> |
|---------------------|--------------|---------------------|--------------|-------------------|
| CTL DMEM            |              | <b>1E-20</b>        | 0.95         | <b>1E-20</b>      |
| DMEM E <sub>2</sub> | <b>1E-20</b> |                     | <b>1E-20</b> | <b>0.0076</b>     |
| CTL HF              | 0.95         | <b>1E-20</b>        |              | <b>1E-20</b>      |
| HF E <sub>2</sub>   | <b>1E-20</b> | <b>0.0076</b>       | <b>1E-20</b> |                   |

**Table S7.**  $E_1$  values (in Pa) for MCF-7 cells measured with tips, shown are the number of measurements, the mean value, the standard deviation, the standard error of the mean value and the median.

|                     | N   | Mean | SD  | SE | Median |
|---------------------|-----|------|-----|----|--------|
| CTL DMEM            | 319 | 445  | 187 | 10 | 416    |
| DMEM E <sub>2</sub> | 356 | 427  | 213 | 11 | 364    |
| CTL HF              | 334 | 598  | 305 | 17 | 501    |
| HF E <sub>2</sub>   | 333 | 371  | 162 | 9  | 348    |

**Table S8.** Statistical analysis of  $E_1$  values for MCF-7 cells (Kruskal-Wallis-ANOVA). Differences with statistical significance are shown as bold.

|                     | CTL DMEM      | DMEM E <sub>2</sub> | CTL HF         | HF E <sub>2</sub> |
|---------------------|---------------|---------------------|----------------|-------------------|
| CTL DMEM            |               | <b>0.0256</b>       | <b>1E-11</b>   | <b>2E-7</b>       |
| DMEM E <sub>2</sub> | <b>0.0256</b> |                     | <b>1.3E-17</b> | <b>0.004</b>      |
| CTL HF              | <b>1E-11</b>  | <b>1.3E-17</b>      |                | <b>1E-20</b>      |
| HF E <sub>2</sub>   | <b>2E-7</b>   | <b>0.004</b>        | <b>1E-20</b>   |                   |

**Table S9.**  $E_2$  values (in Pa) for MCF-7 cells measured with tips, shown are the number of measurements, the mean value, the standard deviation, the standard error of the mean value and the median.

|                     | N   | Mean | SD  | SE | Median |
|---------------------|-----|------|-----|----|--------|
| CTL DMEM            | 316 | 399  | 175 | 10 | 375    |
| DMEM E <sub>2</sub> | 371 | 380  | 224 | 12 | 322    |
| CTL HF              | 339 | 510  | 258 | 14 | 449    |
| HF E <sub>2</sub>   | 333 | 304  | 138 | 8  | 88     |

**Table S10.** Statistical analysis of E<sub>2</sub> values for MCF-7 cells (Kruskal-Wallis-ANOVA). Differences with statistical significance are shown as bold.

|                     | CTL DMEM      | DMEM E <sub>2</sub> | CTL HF       | HF E <sub>2</sub> |
|---------------------|---------------|---------------------|--------------|-------------------|
| CTL DMEM            |               | <b>0.0014</b>       | 8E-8         | <b>3E-13</b>      |
| DMEM E <sub>2</sub> | <b>0.0014</b> |                     | <b>6E-16</b> | <b>1E-4</b>       |
| CTL HF              | 8E-8          | <b>6E-16</b>        |              | <b>1E-20</b>      |
| HF E <sub>2</sub>   | <b>3E-13</b>  | <b>1E-4</b>         | <b>1E-20</b> |                   |

**Table S11.** E<sub>inst</sub> values (in Pa) for MCF-7 cells measured with tips, shown are the number of measurements, the mean value, the standard deviation, the standard error of the mean value and the median.

|                     | N   | Mean | SD  | SE | Median |
|---------------------|-----|------|-----|----|--------|
| CTL DMEM            | 317 | 1403 | 571 | 32 | 1299   |
| DMEM E <sub>2</sub> | 364 | 1236 | 664 | 35 | 1085   |
| CTL HF              | 333 | 1644 | 764 | 42 | 1492   |
| HF E <sub>2</sub>   | 334 | 996  | 424 | 23 | 952    |

**Table S12.** Statistical analysis of E<sub>inst</sub> values for MCF-7 cells (Kruskal-Wallis-ANOVA). Differences with statistical significance are shown as bold.

|                     | CTL DMEM     | DMEM E <sub>2</sub> | CTL HF       | HF E <sub>2</sub> |
|---------------------|--------------|---------------------|--------------|-------------------|
| CTL DMEM            |              | <b>3E-7</b>         | 1.5E-4       | <b>1E-20</b>      |
| DMEM E <sub>2</sub> | <b>3E-7</b>  |                     | <b>1E-16</b> | <b>3.6E-5</b>     |
| CTL HF              | 1.5E-4       | <b>1E-16</b>        |              | <b>1E-20</b>      |
| HF E <sub>2</sub>   | <b>1E-20</b> | <b>3.6E-5</b>       | <b>1E-20</b> |                   |

**Table S13.** Viscosity  $\eta_1$  values (in Pa s) for MCF-7 cells measured with tips, shown are the number of measurements, the mean value, the standard deviation, the standard error of the mean value and the median.

|                     | N   | Mean | SD | SE | Median |
|---------------------|-----|------|----|----|--------|
| CTL DMEM            | 319 | 81   | 42 | 2  | 71     |
| DMEM E <sub>2</sub> | 373 | 82   | 51 | 3  | 69     |
| CTL HF              | 340 | 97   | 56 | 3  | 81     |
| HF E <sub>2</sub>   | 335 | 71   | 36 | 1  | 65     |

**Table S14.** Statistical analysis of Viscosity  $\eta_1$  values for MCF-7 cells (Kruskal-Wallis-ANOVA). Differences with statistical significance are shown as bold.

|                     | CTL DMEM      | DMEM E <sub>2</sub> | CTL HF        | HF E <sub>2</sub> |
|---------------------|---------------|---------------------|---------------|-------------------|
| CTL DMEM            |               | 0.40                | <b>6.4E-4</b> | <b>0.004</b>      |
| DMEM E <sub>2</sub> | 0.40          |                     | <b>3E-5</b>   | 0.06              |
| CTL HF              | <b>6.4E-4</b> | <b>3E-5</b>         |               | 3E-10             |
| HF E <sub>2</sub>   | 0.004         | 0.06                | <b>3E-10</b>  |                   |

**Table S15.** Viscosity  $\eta_2$  values (in Pa s) for MCF-7 cells measured with tips, shown are the number of measurements, the mean value, the standard deviation, the standard error of the mean value and the median.

|                     | N   | Mean | SD  | SE | Median |
|---------------------|-----|------|-----|----|--------|
| CTL DMEM            | 321 | 1270 | 822 | 46 | 1068   |
| DMEM E <sub>2</sub> | 373 | 1206 | 904 | 47 | 912    |
| CTL HF              | 337 | 1394 | 834 | 45 | 1206   |
| HF E <sub>2</sub>   | 334 | 928  | 522 | 29 | 791    |

**Table S16.** Statistical analysis of Viscosity  $\eta_2$  values for MCF-7 cells (Kruskal-Wallis-ANOVA). Differences with statistical significance are shown as bold.

|                     | CTL DMEM    | DMEM E <sub>2</sub> | CTL HF       | HF E <sub>2</sub> |
|---------------------|-------------|---------------------|--------------|-------------------|
| CTL DMEM            |             | 0.048               | <b>0.02</b>  | <b>2E-7</b>       |
| DMEM E <sub>2</sub> | 0.048       |                     | <b>10E-6</b> | <b>0.002</b>      |
| CTL HF              | <b>0.02</b> | <b>10E-6</b>        |              | <b>1E-15</b>      |
| HF E <sub>2</sub>   | <b>2E-7</b> | <b>0.002</b>        | <b>1E-15</b> |                   |

### 3.2. Measurements performed with particles

#### 3.2.1. Elastic properties

**Table S17.** Apparent Young's Modulus values (in Pa) for MCF-7 cells measured with particles, shown are the number of measurements, the mean value, the standard deviation, the standard error of the mean value and the median.

|                     | N   | Mean | SD  | SE | Median |
|---------------------|-----|------|-----|----|--------|
| CTL DMEM            | 212 | 309  | 131 | 9  | 292    |
| DMEM E <sub>2</sub> | 385 | 276  | 145 | 7  | 240    |
| CTL HF              | 260 | 437  | 206 | 13 | 407    |
| HF E <sub>2</sub>   | 345 | 317  | 137 | 7  | 296    |

**Table S18.** Statistical analysis of apparent Young's Modulus values for MCF-7 cells (Kruskal-Wallis ANOVA). Differences with statistical significance are shown as bold.

|                     | CTL DMEM      | DMEM E <sub>2</sub> | CTL HF       | HF E <sub>2</sub> |
|---------------------|---------------|---------------------|--------------|-------------------|
| CTL DMEM            |               | <b>4.1E-4</b>       | <b>1E-11</b> | 0.62              |
| DMEM E <sub>2</sub> | <b>4.1E-4</b> |                     | <b>1E-20</b> | <b>8E-6</b>       |
| CTL HF              | <b>1E-11</b>  | <b>1E-20</b>        |              | <b>1E-12</b>      |
| HF E <sub>2</sub>   | 0.62          | <b>8E-6</b>         | <b>1E-12</b> |                   |

**Table S19.** Indentation values (in  $\mu\text{m}$ ) for MCF-7 cells measured with particles, shown are the number of measurements, the mean value, the standard deviation, the standard error of the mean value and the median.

|                     | N   | Mean | SD   | SE   | Median |
|---------------------|-----|------|------|------|--------|
| CTL DMEM            | 222 | 1.20 | 0.32 | 0.02 | 1.19   |
| DMEM E <sub>2</sub> | 359 | 1.21 | 0.42 | 0.02 | 1.20   |
| CTL HF              | 266 | 1.11 | 0.39 | 0.02 | 1.06   |
| HF E <sub>2</sub>   | 289 | 1.12 | 0.44 | 0.03 | 1.11   |

**Table S20.** Statistical analysis of apparent Young's Modulus values for MCF-7 cells (one-way ANOVA with post-hoc Tukey test). Differences with statistical significance are shown as bold.

|                     | CTL DMEM | DMEM E <sub>2</sub> | CTL HF       | HF E <sub>2</sub> |
|---------------------|----------|---------------------|--------------|-------------------|
| CTL DMEM            |          | 0.99                | 0.09         | 0.061             |
| DMEM E <sub>2</sub> | 0.99     |                     | <b>0.018</b> | <b>0.0096</b>     |
| CTL HF              | 0.09     | <b>0.018</b>        |              | 0.99              |
| HF E <sub>2</sub>   | 0.061    | <b>0.0096</b>       | 0.99         |                   |

## 3.2.2. Viscoelastic properties

**Table S21.** Equilibrium Modulus values (in Pa) for MCF-7 cells measured with particles shown are the number of measurements, the mean value, the standard deviation, the standard error of the mean value and the median.

|                     | N   | Mean | SD | SE | Median |
|---------------------|-----|------|----|----|--------|
| CTL DMEM            | 215 | 99   | 44 | 3  | 95     |
| DMEM E <sub>2</sub> | 396 | 83   | 51 | 3  | 68     |
| CTL HF              | 252 | 122  | 73 | 5  | 108    |
| HF E <sub>2</sub>   | 360 | 108  | 58 | 3  | 89     |

**Table S22.** Statistical analysis of equilibrium Modulus values for MCF-7 cells (one-way ANOVA with post-hoc Tukey test). Differences with statistical significance are shown as bold.

|                     | CTL DMEM    | DMEM E <sub>2</sub> | CTL HF       | HF E <sub>2</sub> |
|---------------------|-------------|---------------------|--------------|-------------------|
| CTL DMEM            |             | <b>3E-9</b>         | <b>0.007</b> | 0.60              |
| DMEM E <sub>2</sub> | <b>3E-9</b> |                     | <b>5E-13</b> | <b>1E-11</b>      |
| CTL HF              | 0.007       | <b>5E-13</b>        |              | <b>0.047</b>      |
| HF E <sub>2</sub>   | 0.60        | <b>1E-11</b>        | <b>0.047</b> |                   |

**Table S23.** E<sub>1</sub> values (in Pa) for MCF-7 cells measured with particles, shown are the number of measurements, the mean value, the standard deviation, the standard error of the mean value and the median.

|                     | N   | Mean | SD | SE | Median |
|---------------------|-----|------|----|----|--------|
| CTL DMEM            | 215 | 86   | 51 | 3  | 68     |
| DMEM E <sub>2</sub> | 396 | 74   | 45 | 2  | 57     |
| CTL HF              | 252 | 87   | 44 | 3  | 76     |
| HF E <sub>2</sub>   | 360 | 80   | 38 | 2  | 70     |

**Table S24.** Statistical analysis of E<sub>1</sub> values for MCF-7 cells (Kruskal-Wallis-ANOVA). Differences with statistical significance are shown as bold.

|                     | CTL DMEM    | DMEM E <sub>2</sub> | CTL HF      | HF E <sub>2</sub> |
|---------------------|-------------|---------------------|-------------|-------------------|
| CTL DMEM            |             | <b>2E-5</b>         | 0.29        | 0.68              |
| DMEM E <sub>2</sub> | <b>2E-5</b> |                     | <b>1E-6</b> | <b>2E-5</b>       |
| CTL HF              | 0.29        | <b>1E-6</b>         |             | 0.10              |
| HF E <sub>2</sub>   | 0.68        | <b>2E-5</b>         | 0.10        |                   |

**Table S25.** E<sub>2</sub> values (in Pa) for MCF-7 cells measured with particles, shown are the number of measurements, the mean value, the standard deviation, the standard error of the mean value and the median.

|                     | N   | Mean | SD | SE | Median |
|---------------------|-----|------|----|----|--------|
| CTL DMEM            | 215 | 64   | 34 | 2  | 54     |
| DMEM E <sub>2</sub> | 396 | 58   | 37 | 2  | 45     |
| CTL HF              | 252 | 73   | 42 | 3  | 60     |
| HF E <sub>2</sub>   | 360 | 62   | 29 | 2  | 55     |

**Table S26.** Statistical analysis of E<sub>2</sub> values for MCF-7 cells (Kruskal-Wallis-ANOVA). Differences with statistical significance are shown as bold.

|                     | CTL DMEM     | DMEM E <sub>2</sub> | CTL HF       | HF E <sub>2</sub> |
|---------------------|--------------|---------------------|--------------|-------------------|
| CTL DMEM            |              | <b>9E-5</b>         | <b>0.036</b> | 0.79              |
| DMEM E <sub>2</sub> | <b>9E-5</b>  |                     | <b>2E-8</b>  | <b>4E-5</b>       |
| CTL HF              | <b>0.036</b> | <b>2E-8</b>         |              | <b>0.008</b>      |

|                   |      |             |              |
|-------------------|------|-------------|--------------|
| HF E <sub>2</sub> | 0.79 | <b>4E-5</b> | <b>0.008</b> |
|-------------------|------|-------------|--------------|

**Table S27.**  $E_{inst}$  values (in Pa) for MCF-7 cells measured with particles, shown are the number of measurements, the mean value, the standard deviation, the standard error of the mean value and the median.

|                     | N   | Mean | SD  | SE | Median |
|---------------------|-----|------|-----|----|--------|
| CTL DMEM            | 215 | 251  | 117 | 8  | 214    |
| DMEM E <sub>2</sub> | 396 | 216  | 132 | 7  | 170    |
| CTL HF              | 252 | 284  | 151 | 10 | 248    |
| HF E <sub>2</sub>   | 360 | 250  | 125 | 7  | 214    |

**Table S28.** Statistical analysis of  $E_{inst}$  values for MCF-7 cells (Kruskal-Wallis-ANOVA). Differences with statistical significance are shown as bold.

|                     | CTL DMEM     | DMEM E <sub>2</sub> | CTL HF       | HF E <sub>2</sub> |
|---------------------|--------------|---------------------|--------------|-------------------|
| CTL DMEM            |              | <b>2E-7</b>         | <b>0.036</b> | 0.56              |
| DMEM E <sub>2</sub> | <b>2E-7</b>  |                     | <b>5E-11</b> | <b>4E-7</b>       |
| CTL HF              | <b>0.036</b> | <b>5E-11</b>        |              | <b>0.007</b>      |
| HF E <sub>2</sub>   | 0.56         | <b>4E-7</b>         | <b>0.007</b> |                   |

**Table S29.** Viscosity  $\eta_1$  values (in Pa s) for MCF-7 cells measured with particles, shown are the number of measurements, the mean value, the standard deviation, the standard error of the mean value and the median.

|                     | N   | Mean | SD  | SE  | Median |
|---------------------|-----|------|-----|-----|--------|
| CTL DMEM            | 213 | 13.7 | 6.7 | 0.5 | 12.0   |
| DMEM E <sub>2</sub> | 394 | 11.9 | 6.5 | 0.3 | 10.2   |
| CTL HF              | 253 | 16.2 | 9.6 | 0.6 | 14.1   |
| HF E <sub>2</sub>   | 359 | 13.4 | 7.3 | 0.4 | 11.8   |

**Table S30.** Statistical analysis of Viscosity  $\eta_1$  values for MCF-7 cells (Kruskal-Wallis-ANOVA). Differences with statistical significance are shown as bold.

|                     | CTL DMEM      | DMEM E <sub>2</sub> | CTL HF        | HF E <sub>2</sub> |
|---------------------|---------------|---------------------|---------------|-------------------|
| CTL DMEM            |               | <b>1.4E-4</b>       | <b>0.02</b>   | 0.32              |
| DMEM E <sub>2</sub> | <b>1.4E-4</b> |                     | <b>3E-9</b>   | <b>0.002</b>      |
| CTL HF              | <b>0.02</b>   | <b>3E-9</b>         |               | <b>4.1E-4</b>     |
| HF E <sub>2</sub>   | 0.32          | <b>0.002</b>        | <b>4.1E-4</b> |                   |

**Table S31.** Viscosity  $\eta_2$  values (in Pa s) for MCF-7 cells measured with particles, shown are the number of measurements, the mean value, the standard deviation, the standard error of the mean value and the median.

|                     | N   | Mean  | SD    | SE   | Median |
|---------------------|-----|-------|-------|------|--------|
| CTL DMEM            | 217 | 230.6 | 162.7 | 11.0 | 180.7  |
| DMEM E <sub>2</sub> | 393 | 183.9 | 133.2 | 6.7  | 141.2  |
| CTL HF              | 252 | 238.6 | 166.3 | 10.5 | 191.6  |
| HF E <sub>2</sub>   | 359 | 189.4 | 119.1 | 6.3  | 159.9  |

**Table S32.** Statistical analysis of Viscosity  $\eta_2$  values for MCF-7 cells (Kruskal-Wallis-ANOVA). Differences with statistical significance are shown as bold.

|                     | CTL DMEM    | DMEM E <sub>2</sub> | CTL HF      | HF E <sub>2</sub> |
|---------------------|-------------|---------------------|-------------|-------------------|
| CTL DMEM            |             | <b>2E-5</b>         | <b>0.52</b> | <b>0.0049</b>     |
| DMEM E <sub>2</sub> | <b>2E-5</b> |                     | <b>1E-6</b> | <b>0.076</b>      |
| CTL HF              | <b>0.52</b> | <b>1E-6</b>         |             | <b>4.1E-4</b>     |

|                   |        |       |        |  |
|-------------------|--------|-------|--------|--|
| HF E <sub>2</sub> | 0.0049 | 0.076 | 4.1E-4 |  |
|-------------------|--------|-------|--------|--|
